# Supplementary material for: Geographic Mosaics of Fly Pollinators With Divergent Color Preferences Drive Landscape-Scale Structuring of Flower Color in Daisy Communities
Source: Frontiers journal article supplement (doi:10.3389/fpls.2021.617761), 2021-02-01
Supplement: Data_Sheet_1.PDF [file Data_Sheet_1.PDF]

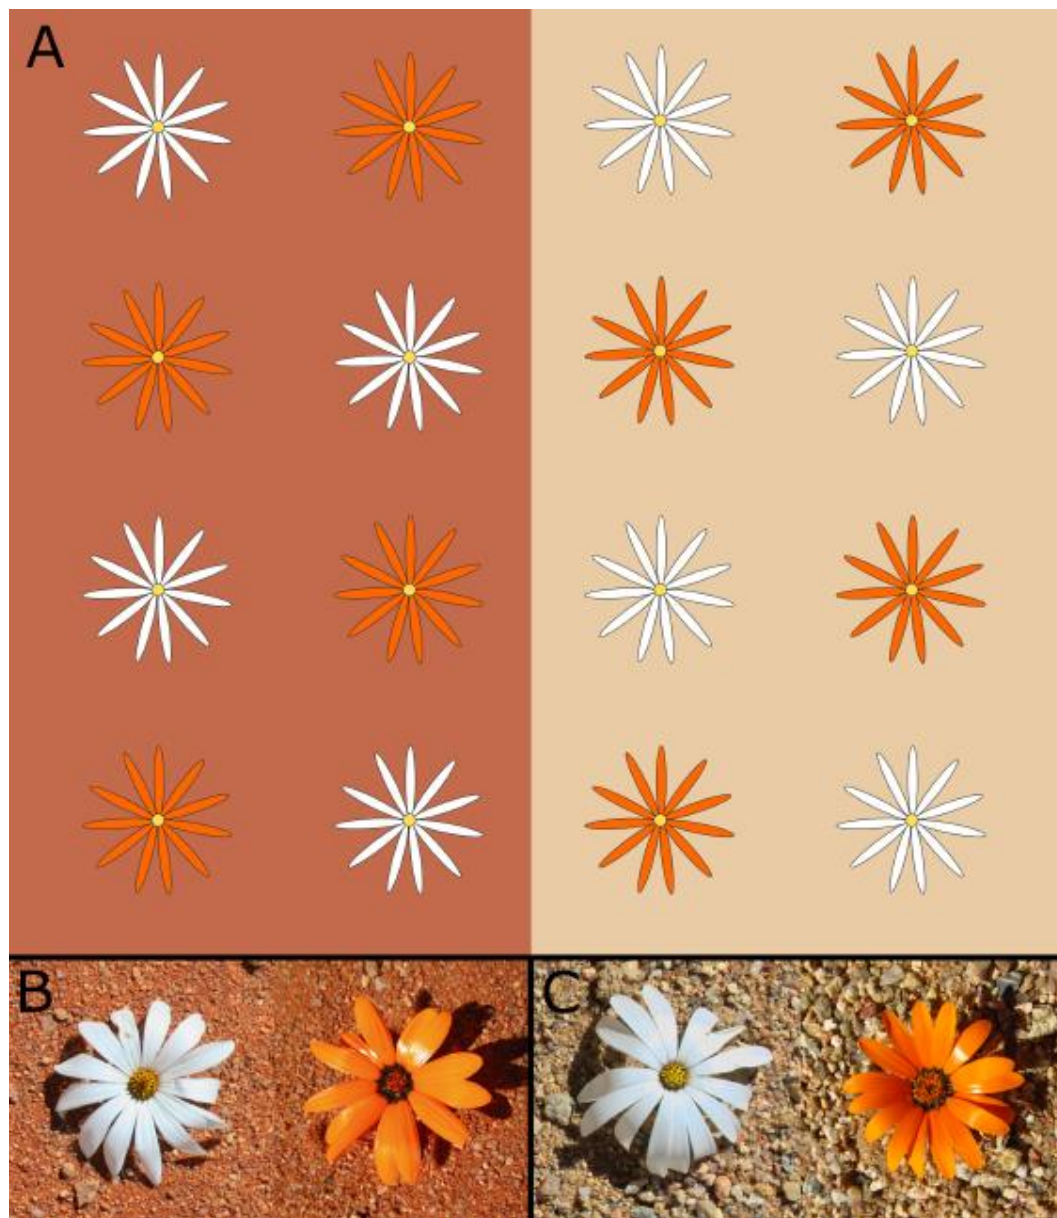

Figure S1. The experimental setup for flower colour choice experiments. (A) Eight white and eight orange inflorescences were presented on two soil types (red marine-derived soils – B; and pale granite gneiss-derived soils – C). Bee fly individuals were offered choices of orange-white species pairs of *Dimorphotheca* and *Ursinia* separately.
